# Supplementary material for: ATF3 induction prevents precocious activation of skeletal muscle stem cell by regulating H2B expression
Source: Springer Nature journal article supplement (doi:10.1038/s41467-023-40465-w), 2023-08-17
Supplement: MOESM1 [file 41467_2023_40465_MOESM1_ESM.pdf]

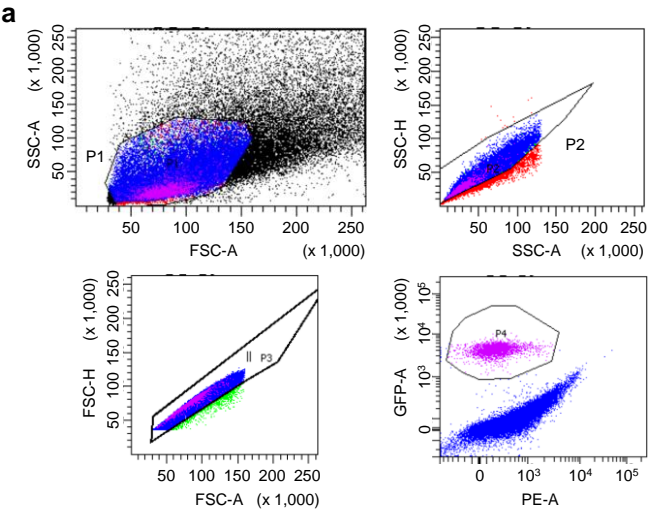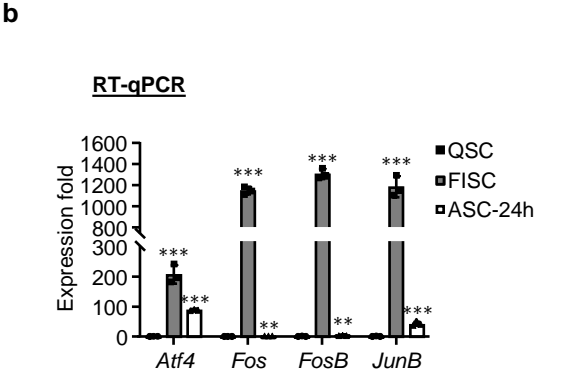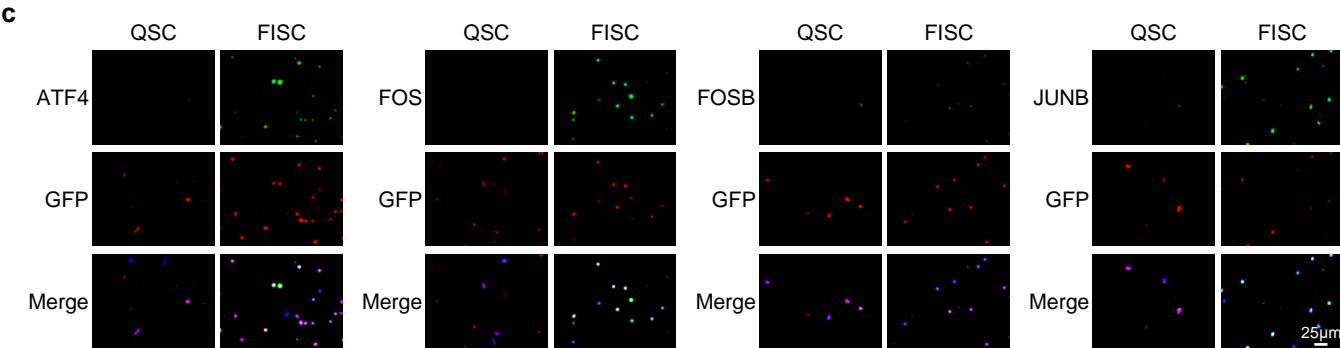

**Supplementary Figure 1. *ATF3* is rapidly and transiently induced during SC early activation.** **a** Sorting strategy for the isolation of SCs from Pax7 nGFP mice and *Atf3* Ctrl and iKO mice. P1-P4 was sequential gating and cells from P4 were collected as SCs. **b** qRT-PCR detection of *Atf4*, *Fos*, *Fosb* and *Junb* in QSC, FISC and ASC-24h from muscles of Tg: *Pax7-nGFP* mice. n = 3 mice per group. From left to right,  $P = 0.00034, 0.00000014, 0.00000064, 0.0018, 0.0000012, 0.0017, 0.000033$  and  $0.00019$ . **c** Immunofluorescence staining of ATF4, FOS, FOSB or JUNB and PAX7 proteins on QSCs and FISCs. Scale bar: 50 $\mu$ m. All the bar graphs are presented as mean  $\pm$  SD., Student's t-test (two-tailed unpaired) was used to calculate the statistical significance (b): \*\*p < 0.01, \*\*\*p < 0.001. Source data are provided as a Source Data file.

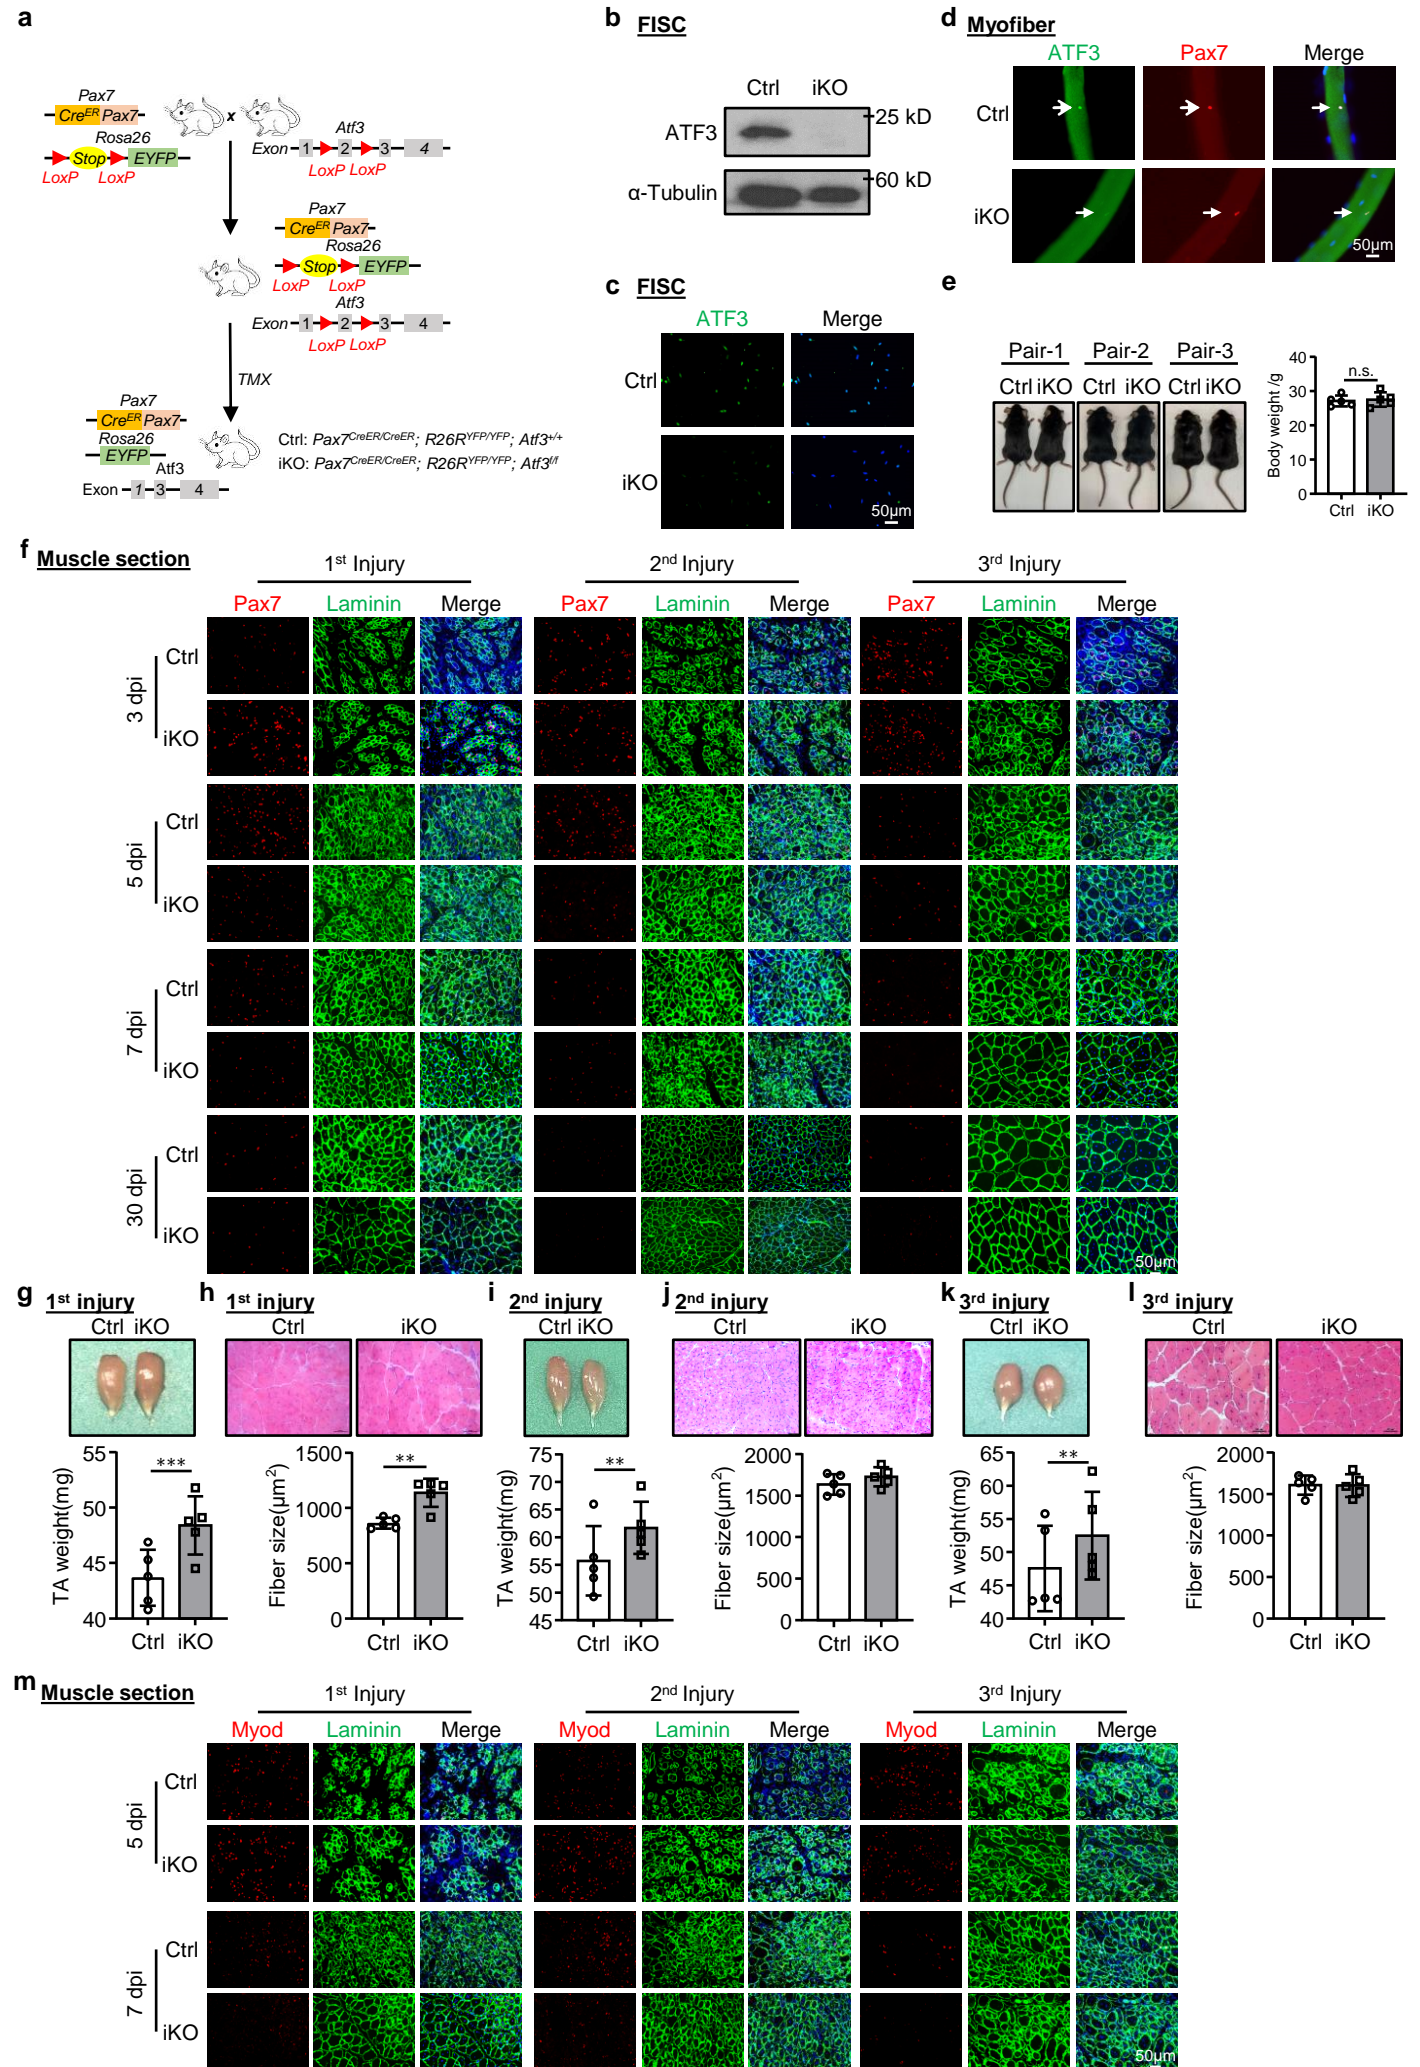

**Supplementary Figure 2. Short-term *Atf3* deletion accelerates acute injury-induced muscle regeneration.** **a** Breeding scheme for generating inducible *Atf3* inducible conditional knock out (*Atf3* iKO) and control (Ctrl) littermates. **b** Loss of ATF3 protein in iKO FISC was confirmed by Western blot.  $\alpha$ -Tubulin was used as a loading control. **c&d** IF staining for Pax7 and ATF3 on (c) FISCs or (d) single myofibers from Ctrl or *Atf3* iKO mice. Scale bar: 50 $\mu$ m. **e** No overt morphological difference or body weight change was observed in representative Ctrl vs iKO mice.  $P = 0.52$ .  $n = 5$  mice per group. **f** IF staining of Pax7 (red), Laminin (green) and Dapi (blue) on Ctrl and iKO TA muscles on uninjured or 3, 5, 7, 30 days post the 1<sup>st</sup>, 2<sup>nd</sup> and 3<sup>rd</sup> round of injury. Scale bar: 50  $\mu$ m. **g** TA muscles from Ctrl or *Atf3* iKO mice 30 days post the 1<sup>st</sup> round injury.  $n = 5$  mice per group.  $P = 0.00073$ . **h** H&E staining of the above TA muscles. Scale bar: 50  $\mu$ m.  $n = 5$  mice per group.  $P = 0.0021$ . **i&j** TA muscles from Ctrl or *Atf3* iKO mice 30 days post the 2<sup>nd</sup> round injury. Scale bar: 50  $\mu$ m (f).  $n = 5$  mice per group.  $P = 0.0070$  (e) and 0.17 (f). **k&l** TA muscles from Ctrl or *Atf3* iKO mice 30 days post the 3<sup>rd</sup> round injury. Scale bar: 50  $\mu$ m (l).  $n = 5$  mice per group.  $P = 0.0014$  (k). and 0.94 (l). **m** IF staining of Myod (red) Laminin (green) and Dapi (blue) on Ctrl and iKO TA muscles at 3 and 5 days post the 1<sup>st</sup>, 2<sup>nd</sup> and 3<sup>rd</sup> round of injury. Scale bar: 50  $\mu$ m;  $n = 5$  mice per group for 3, and 5 days post 1<sup>st</sup> injury;  $n = 3$  mice per group for 3, and 5 days post 2<sup>nd</sup> and 3<sup>rd</sup> injury. All the bar graphs are presented as mean  $\pm$  SD., Student's t-test (two-tailed unpaired) was used to calculate the statistical significance (e, g-l): \* $p < 0.05$ , \*\* $p < 0.01$ , \*\*\* $p < 0.001$ . Source data are provided as a Source Data file.

## a Uninjured muscle

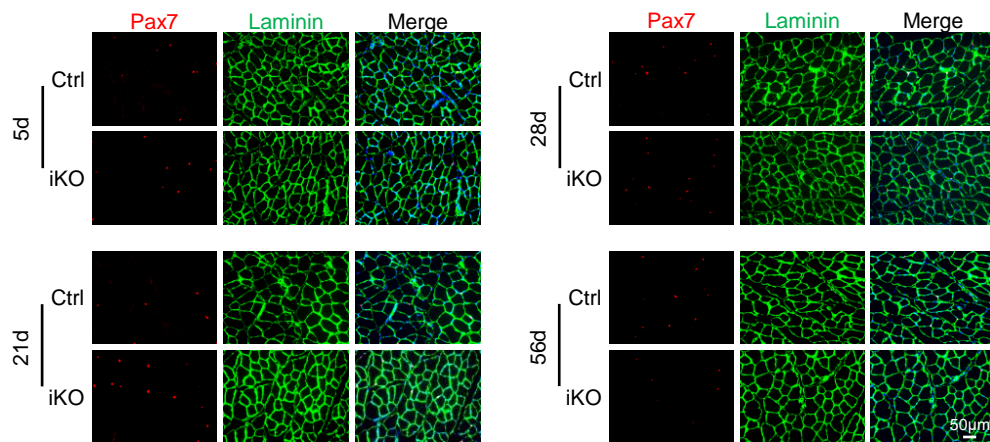

## b Uninjured muscle/ in vivo EdU

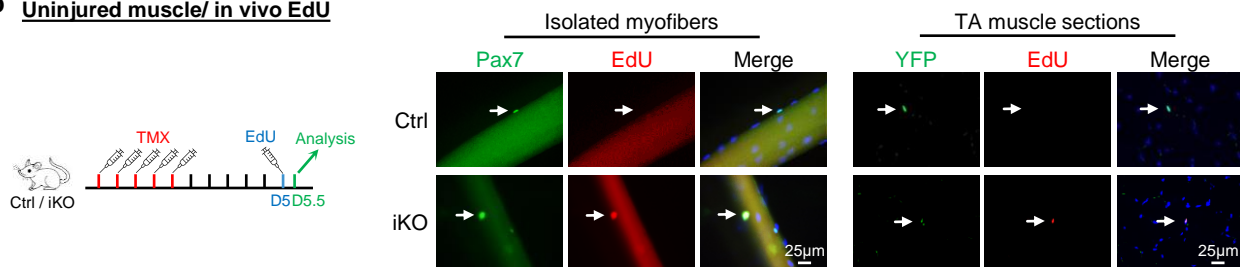

## c

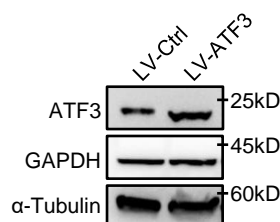

## d

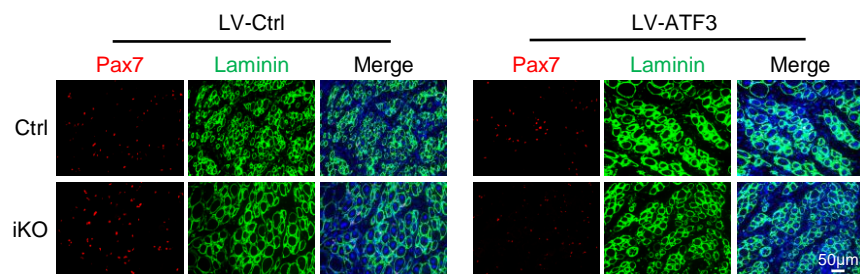

## e

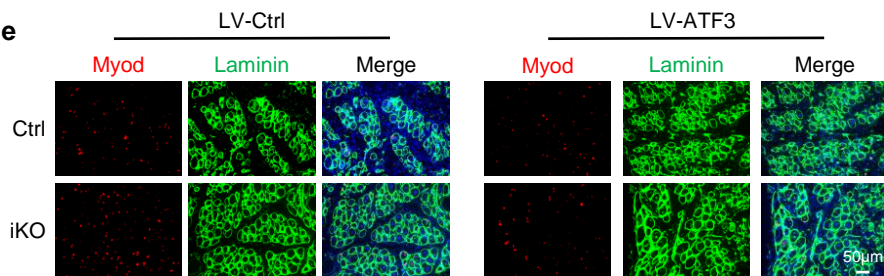

## f

### Myofiber-72h in culture

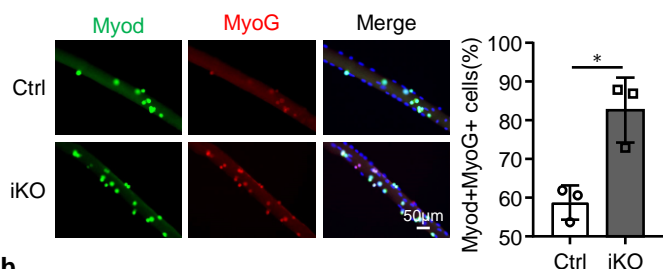

## g

### SC-72h in culture

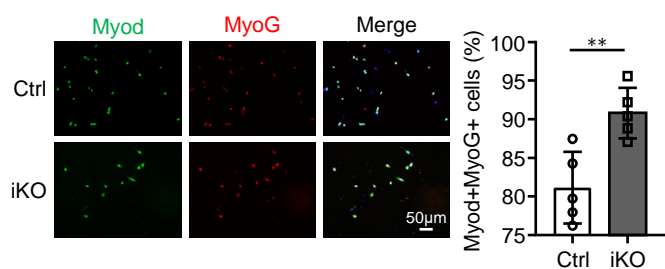

## h

### Myofiber-72h in culture

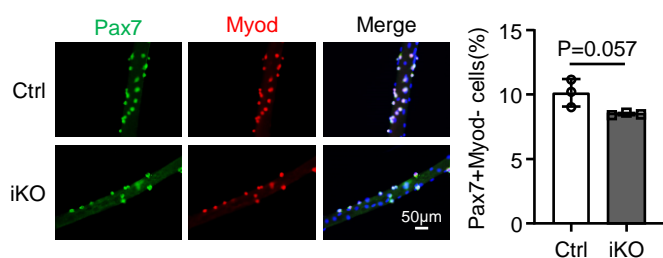

**Supplementary Figure 3. *Atf3* deletion provokes SC premature activation and pseudo-regeneration in homeostatic muscle.** **a** IF staining of Pax7 (red) Laminin (green) and Dapi (blue) on uninjured Ctrl or iKO muscles 5, 21, 28 and 56 days after TMX injection. Scale bar: 50  $\mu$ m. **b** Left: Schematic outline of the EdU assay performed in the study. Middle: EdU (red) and Pax7 (green) staining on freshly single myofibers from the above injected muscles; right: EdU (red) and YFP (green) staining on the above muscles 12h after EdU injection. Scale bar: 25  $\mu$ m; n = 3 mice per group. **c** C2C12 cells were infected with an ATF3 expressing lentivirus and the ATF3 over-expression was confirmed by Western blotting.  $\alpha$ -Tubulin and GAPDH were used as loading controls. **d** ATF3 expressing lentivirus was injected into Ctrl or iKO TA muscles 1 day after BaCl<sub>2</sub> injury. IF staining of Pax7 (red) and Laminin (green) was performed on the TA muscles collected at 5 days after infection. Scale bar: 50  $\mu$ m. n = 4 mice per group. **e** IF staining of Myod (red) and Laminin (green) was performed on the above TA muscles. Scale bar: 50  $\mu$ m. n = 4 mice per group. **f** Left: Single myofibers were isolated from Ctrl or iKO mice and cultured for 72h before IF staining of Myod (green) and MyoG (red) was performed. Scale bar: 50  $\mu$ m. Right: Quantification of the percentage of the Myod+MyoG+ SCs. n = 3 mice per group.  $P = 0.012$ . **g** Left: IF staining of Myod (green) and MyoG (red) on SCs isolated from Ctrl or iKO mice and cultured for 72h. Scale bar: 50  $\mu$ m. Right: Quantification of the percentage of Myod+/MyoG+ SCs on single myofibers; n = 3 mice per group.  $P = 0.0050$ . **h** Left: IF staining of Pax7 (green) and Myod (red) on the above single myofibers. Scale bar: 50  $\mu$ m. Right: Quantification of the percentage of Pax7+Myod+ SCs. n = 3 mice per group.  $P = 0.057$ . All the bar graphs are presented as mean  $\pm$  SD., Student's t-test (two-tailed unpaired) was used to calculate the statistical significance (f-h): \* $p < 0.05$ , \*\* $p < 0.01$ . Source data are provided as a Source Data file.

**a**

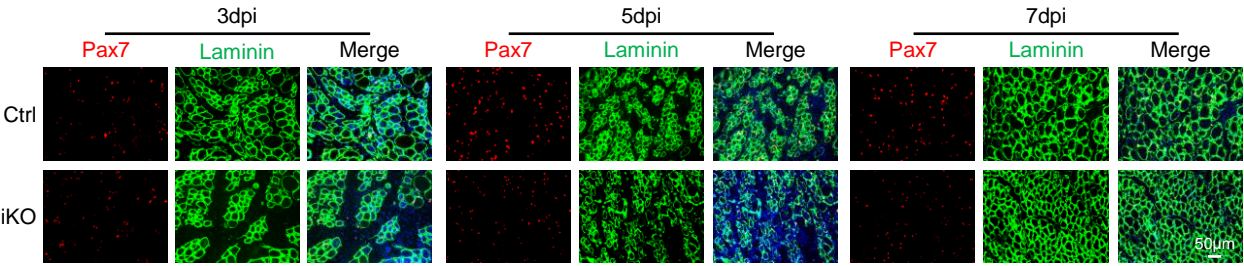

**b**

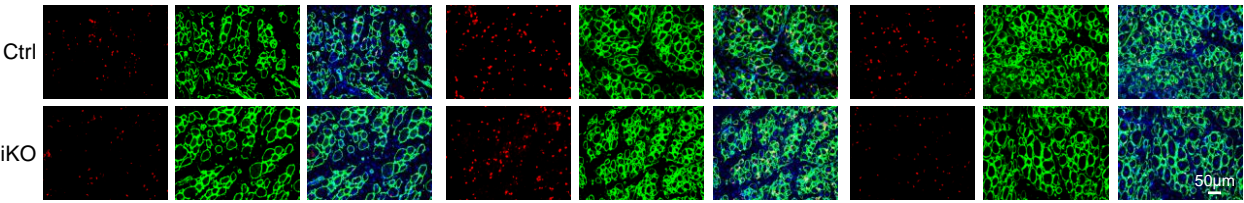

**Supplementary Figure 4. Long-term *Atf3* deficiency in *Atf3* iKO mice depletes SC pool and impairs muscle regeneration.** **a** 30 days chasing after TMX injection was given before BaCl<sub>2</sub> injection. IF staining of Pax7 (red) and Laminin (green) was performed on the TA muscles collected at 3, 5 and 7 dpi after the 30 days chasing period. Scale bar: 50 μm. n = 5 mice per group. **b** 120 days chasing after TMX injection was given before BaCl<sub>2</sub> injection. IF staining of Pax7 (red) and Laminin (green) was performed on the TA muscles collected at 3, 5 and 7 dpi after the 120 days chasing period. Scale bar: 50 μm. n = 5 mice per group.

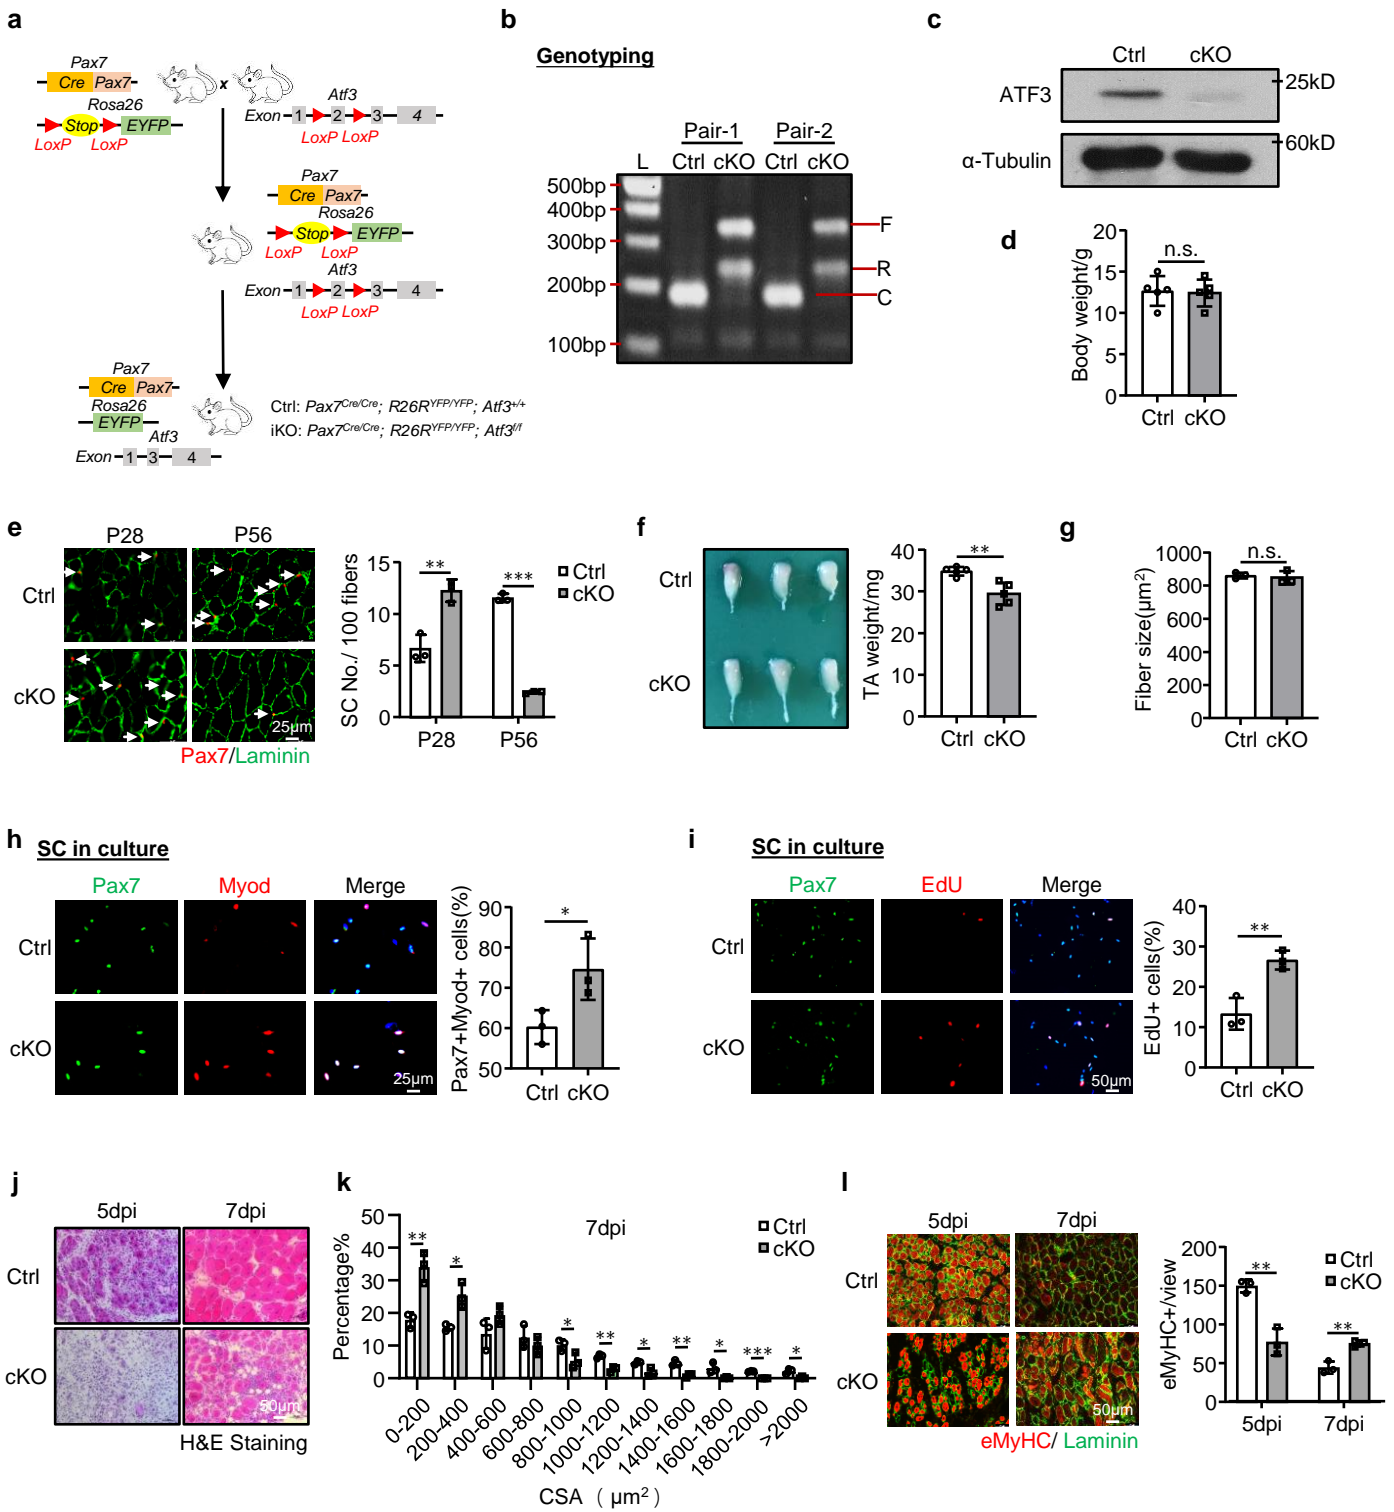

**Supplementary Figure 5. Long-term *Atf3* deficiency in *Atf3* cKO mice depletes SC pool and impairs muscle regeneration.** **a** Breeding scheme for generating inducible *Atf3* conditional knock out (*Atf3* cKO) and control (Ctrl) littermates. **b** Genotyping results of the Ctrl and cKO mice. (F, *Atf3* Floxed; R, Cre recombinase in the *Pax7* locus; C, WT Ctrl). **c** Loss of ATF3 protein in the cKO FISCs was confirmed by western blot.  $\alpha$ -Tubulin was used as a loading control. **d** No overt body weight change was observed in Ctrl vs cKO mice at postnatal 28 days.  $P = 0.83$ . **e** IF staining of Pax7 (red) and Laminin (green) at p28 and p56 on uninjured TA muscles from the Ctrl or cKO mice. Scale bar: 50  $\mu$ m.  $P = 0.0046$  and 0.0000030. **f** Decreased TA muscle size and weight were observed in cKO mice at p28p.  $P = 0.0028$ . **g** Quantification of the average CSAs of fibers at p28 ;  $P = 0.63$ . **h** IF staining of Pax7 (green) and MyoD (red) on SCs from the Ctrl or cKO mice after cultured for 24 h. Scale bar: 25  $\mu$ m.  $P = 0.046$ . **i** from Ctrl or cKO mice were cultured for 24 h before treating with EdU for 6 h and staining for EdU (red) and Pax7 (green). Scale bar: 50  $\mu$ m.  $P = 0.0071$ . **j** H&E staining of the TA muscles collected at 5 and 7 dpi from Ctrl or cKO mice. Scale bar: 50  $\mu$ m. **k** CSAs of newly formed fibers were quantified from the above-collected TA muscle at 7dpi and the distribution is shown. From left to right,  $P = 0.0055, 0.013, 0.043, 0.0026, 0.020, 0.0038, 0.030, 0.0000085$  and 0.018. **l** IF staining of eMyHC (red) and laminin (green) was performed on the above TA muscles collected at 5 and 7 dpi. Scale bar: 50  $\mu$ m.  $P = 0.0030$  and 0.0038.  $n=5$  mice per group (d, f);  $n=3$  mice per group (e, g-l). All the bar graphs are presented as mean  $\pm$  SD., Student's t test (two-tailed unpaired) was used to calculate the statistical significance (f-k, m-n): \* $p < 0.05$ , \*\* $p < 0.01$ , \*\*\* $p < 0.001$ . n.s., no significance. Source data are provided as a Source Data file.

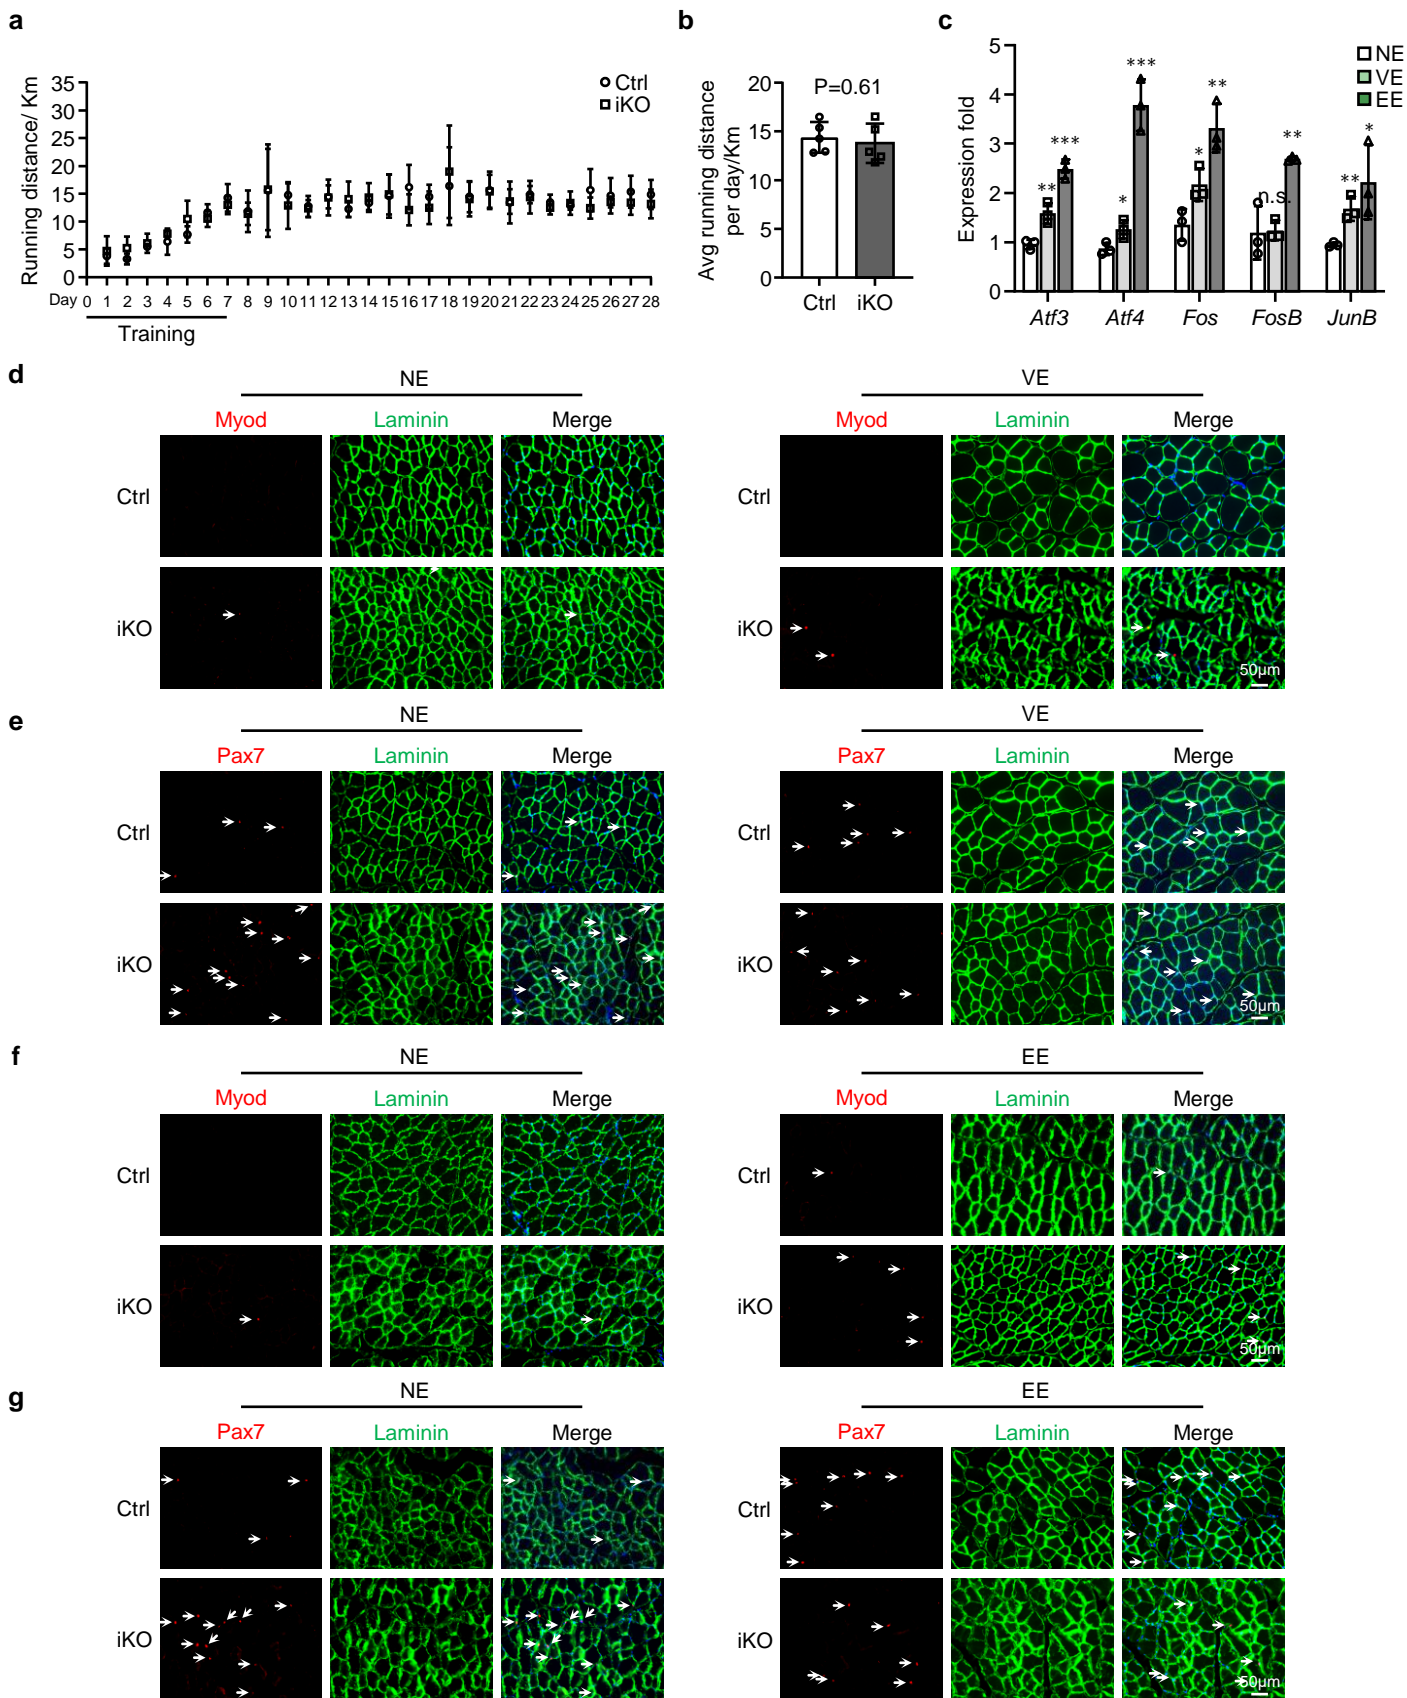

**Supplementary Figure 6. *Atf3* deletion induces SC activation during voluntary and endurance exercises.** **a** Ctrl and iKO mice were subject to voluntary running wheels for 1 week and followed by 3 more weeks of running. The daily running distance of Ctrl and iKO mice was recorded.  $n = 5$  mice per group. **b** The average running distance per day of Ctrl and iKO mice.  $n = 5$  mice per group.  $P = 0.61$ . **c** qRT-PCR detection of *Atf3*, *Atf4*, *Fos*, *FosB* and *Junb* in FISC isolated from Ctrl muscles NE, VE or EE.  $n = 3$  mice per group. From left to right,  $P = 0.0091, 0.00026, 0.035, 0.00073, 0.038, 0.0044, 0.89, 0.0090, 0.0076$  and  $0.043$  **d** IF staining of Myod (red) and Laminin (green) was performed on the TA muscles collected from Ctrl or iKO mice with VE or Ctrl with no exercise (NE). Scale bar:  $50\ \mu\text{m}$ . **e** IF staining of Pax7 (red) and Laminin (green) on the above collected TA muscles Scale bar:  $50\ \mu\text{m}$ . **f** IF staining of Myod (red) and Laminin (green) on the TA muscles collected from the Ctrl and iKO mice with EE or Ctrl with no exercise (NE). Scale bar:  $50\ \mu\text{m}$ . **g** IF staining of Pax7 (red) and Laminin (green) on the above collected TA muscles. Scale bar:  $50\ \mu\text{m}$ . All the bar graphs are presented as mean  $\pm$  SD., Student's t-test (two-tailed unpaired) was used to calculate the statistical significance (b-c): \* $p < 0.05$ , \*\* $p < 0.01$ , \*\*\* $p < 0.001$ . n.s., no significance. Source data are provided as a Source Data file.

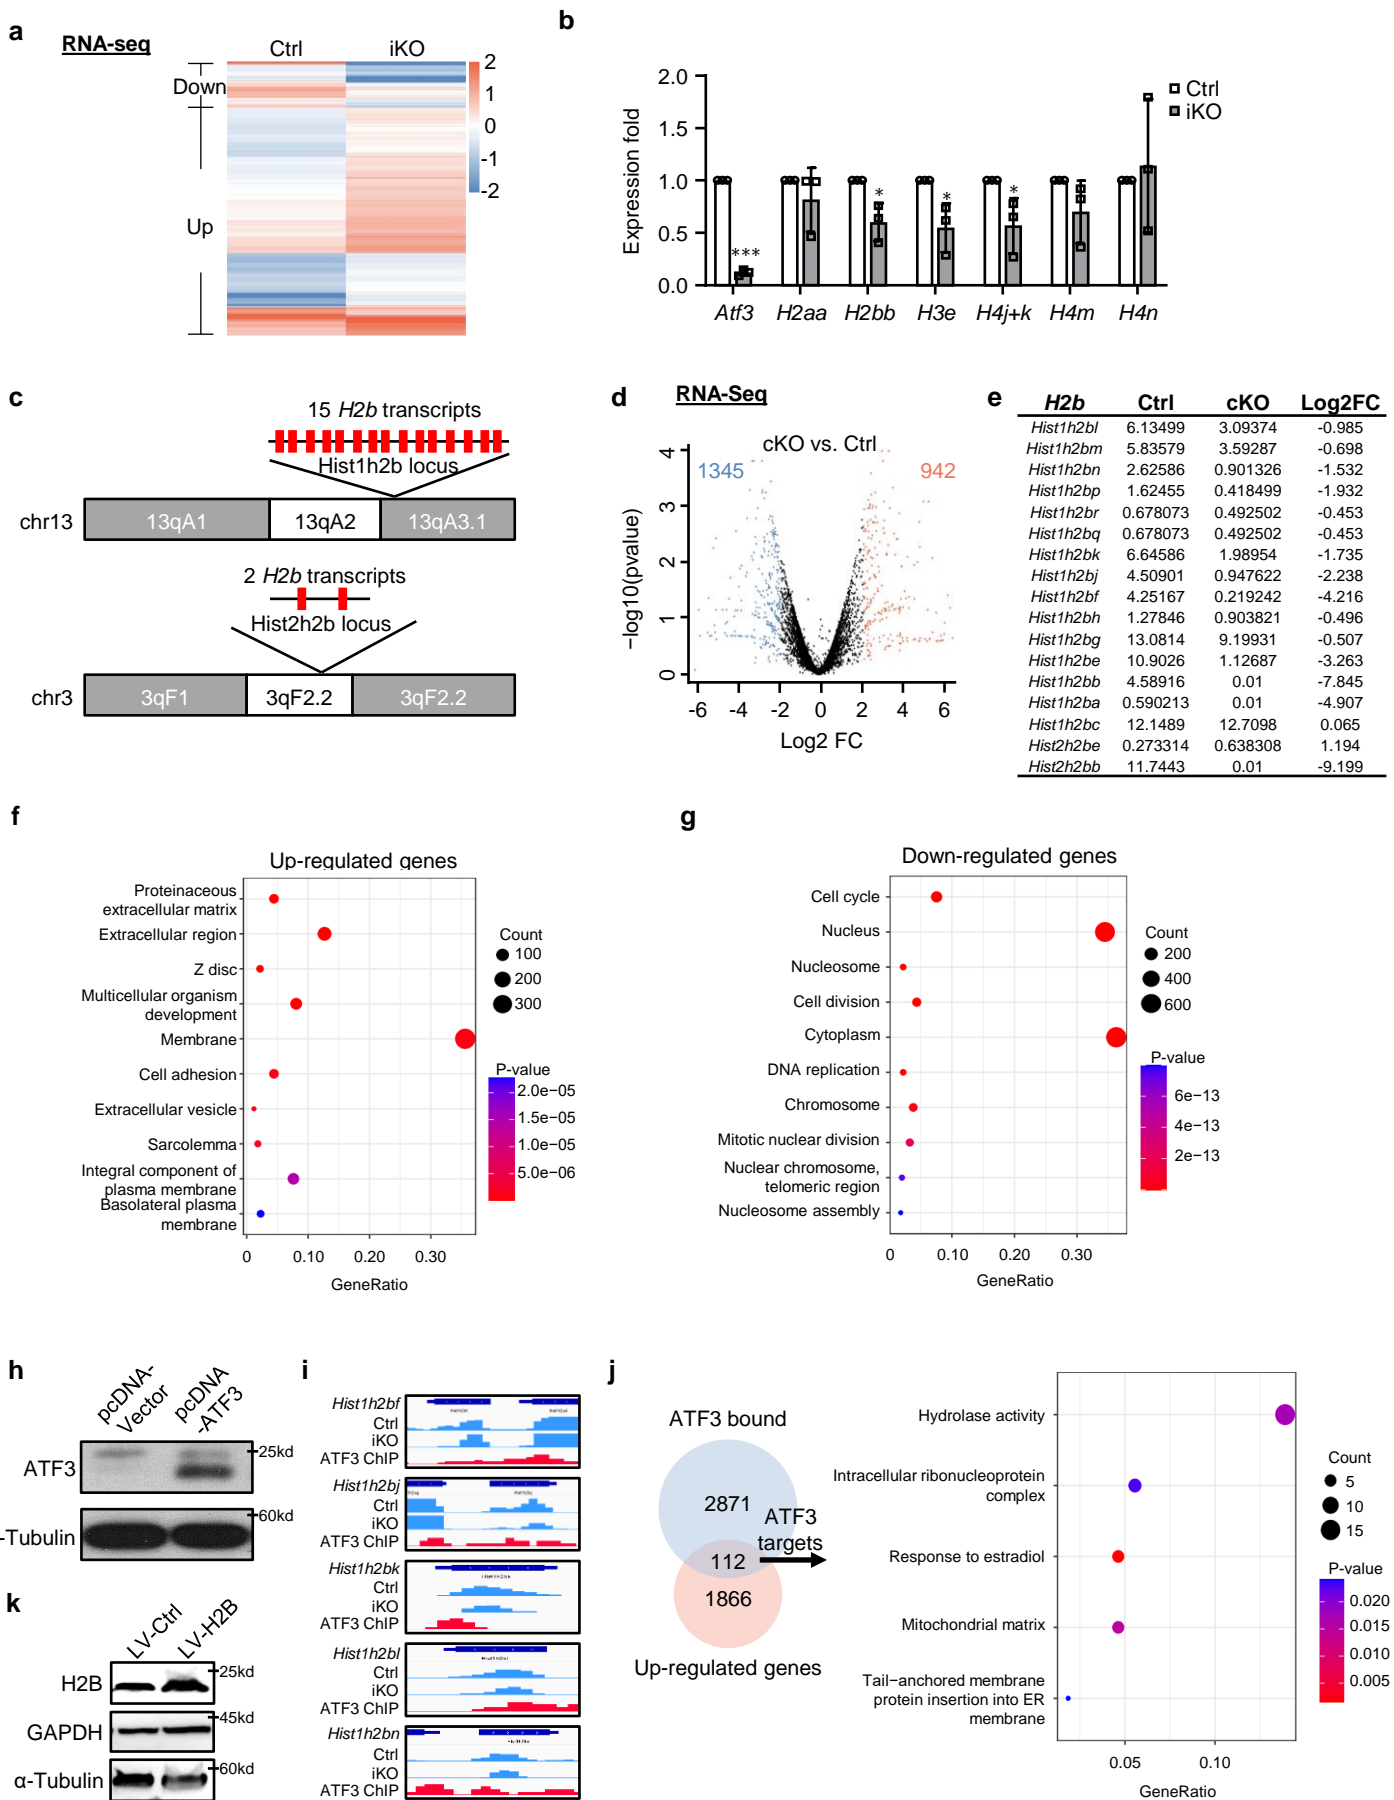

**Supplementary Figure 7. ATF3 regulates *H2B* gene expression and nucleosome patterning.** **a** RNA-Seq was performed in FISCs from the Ctrl and iKO cells and heat maps indicating differential gene expression levels (Log2[FPKM]) in the *Atf3* iKO vs. Ctrl. **b** RT-qPCR validation of the expression of selected histone genes in the iKO vs. Ctrl. From left to right,  $P = 0.00000079$ , 0.018, 0.028 and 0.047. **c** Illustration of the 2 clusters of Histone H2B coding genes on mouse chr3 and chr13. **d** RNA-Seq was performed in FISCs from the Ctrl and cKO mice. DEGs were identified in the cKO vs. Ctrl. **e** FPKM and Log2 fold change (FC) of *H2b* genes from the above RNA-Seq. **f&g** Gene ontology (GO) analyses of the above identified up and down-regulated genes in D. The top 10 enriched GO terms ranked by gene ratio (proportion of genes annotated for each GO term) are shown. Dots are colored by adjusted P value (fold change) and their size corresponds to the gene counts annotated to each GO term. **h** ATF3 was overexpressed in C2C12 with a pcDNA3.1-ATF3 plasmid.  $\alpha$ -Tubulin was used as a loading control. **i** Genomic snapshots of 5 of the above identified *H2b* genes (*Hist1h2bf*, *Hist1h2bj*, *Hist1h2bk*, *Hist1h2l* and *Hist1h2bn*) with ATF3 binding in their TSSs (ChIP-Seq tracks) and down-regulated by *Atf3* deletion (RNA-Seq tracks). **j** Left: Venn diagrams show the overlapping (112 genes) between the ATF3 ChIP-Seq target genes (2871) and the up-regulated genes (1866). Right: GO analysis of the above 112 genes. **k** C2C12 cells were infected with a H2B expressing lentivirus and the H2B overexpression is confirmed by Western blotting.  $\alpha$ -Tubulin and GAPDH were used as loading controls. All the bar graphs are presented as mean  $\pm$  SD., Student's t-test (two-tailed unpaired) was used to calculate the statistical significance (b): \* $p < 0.05$ , \*\*\* $p < 0.001$ . Source data are provided as a Source Data file.

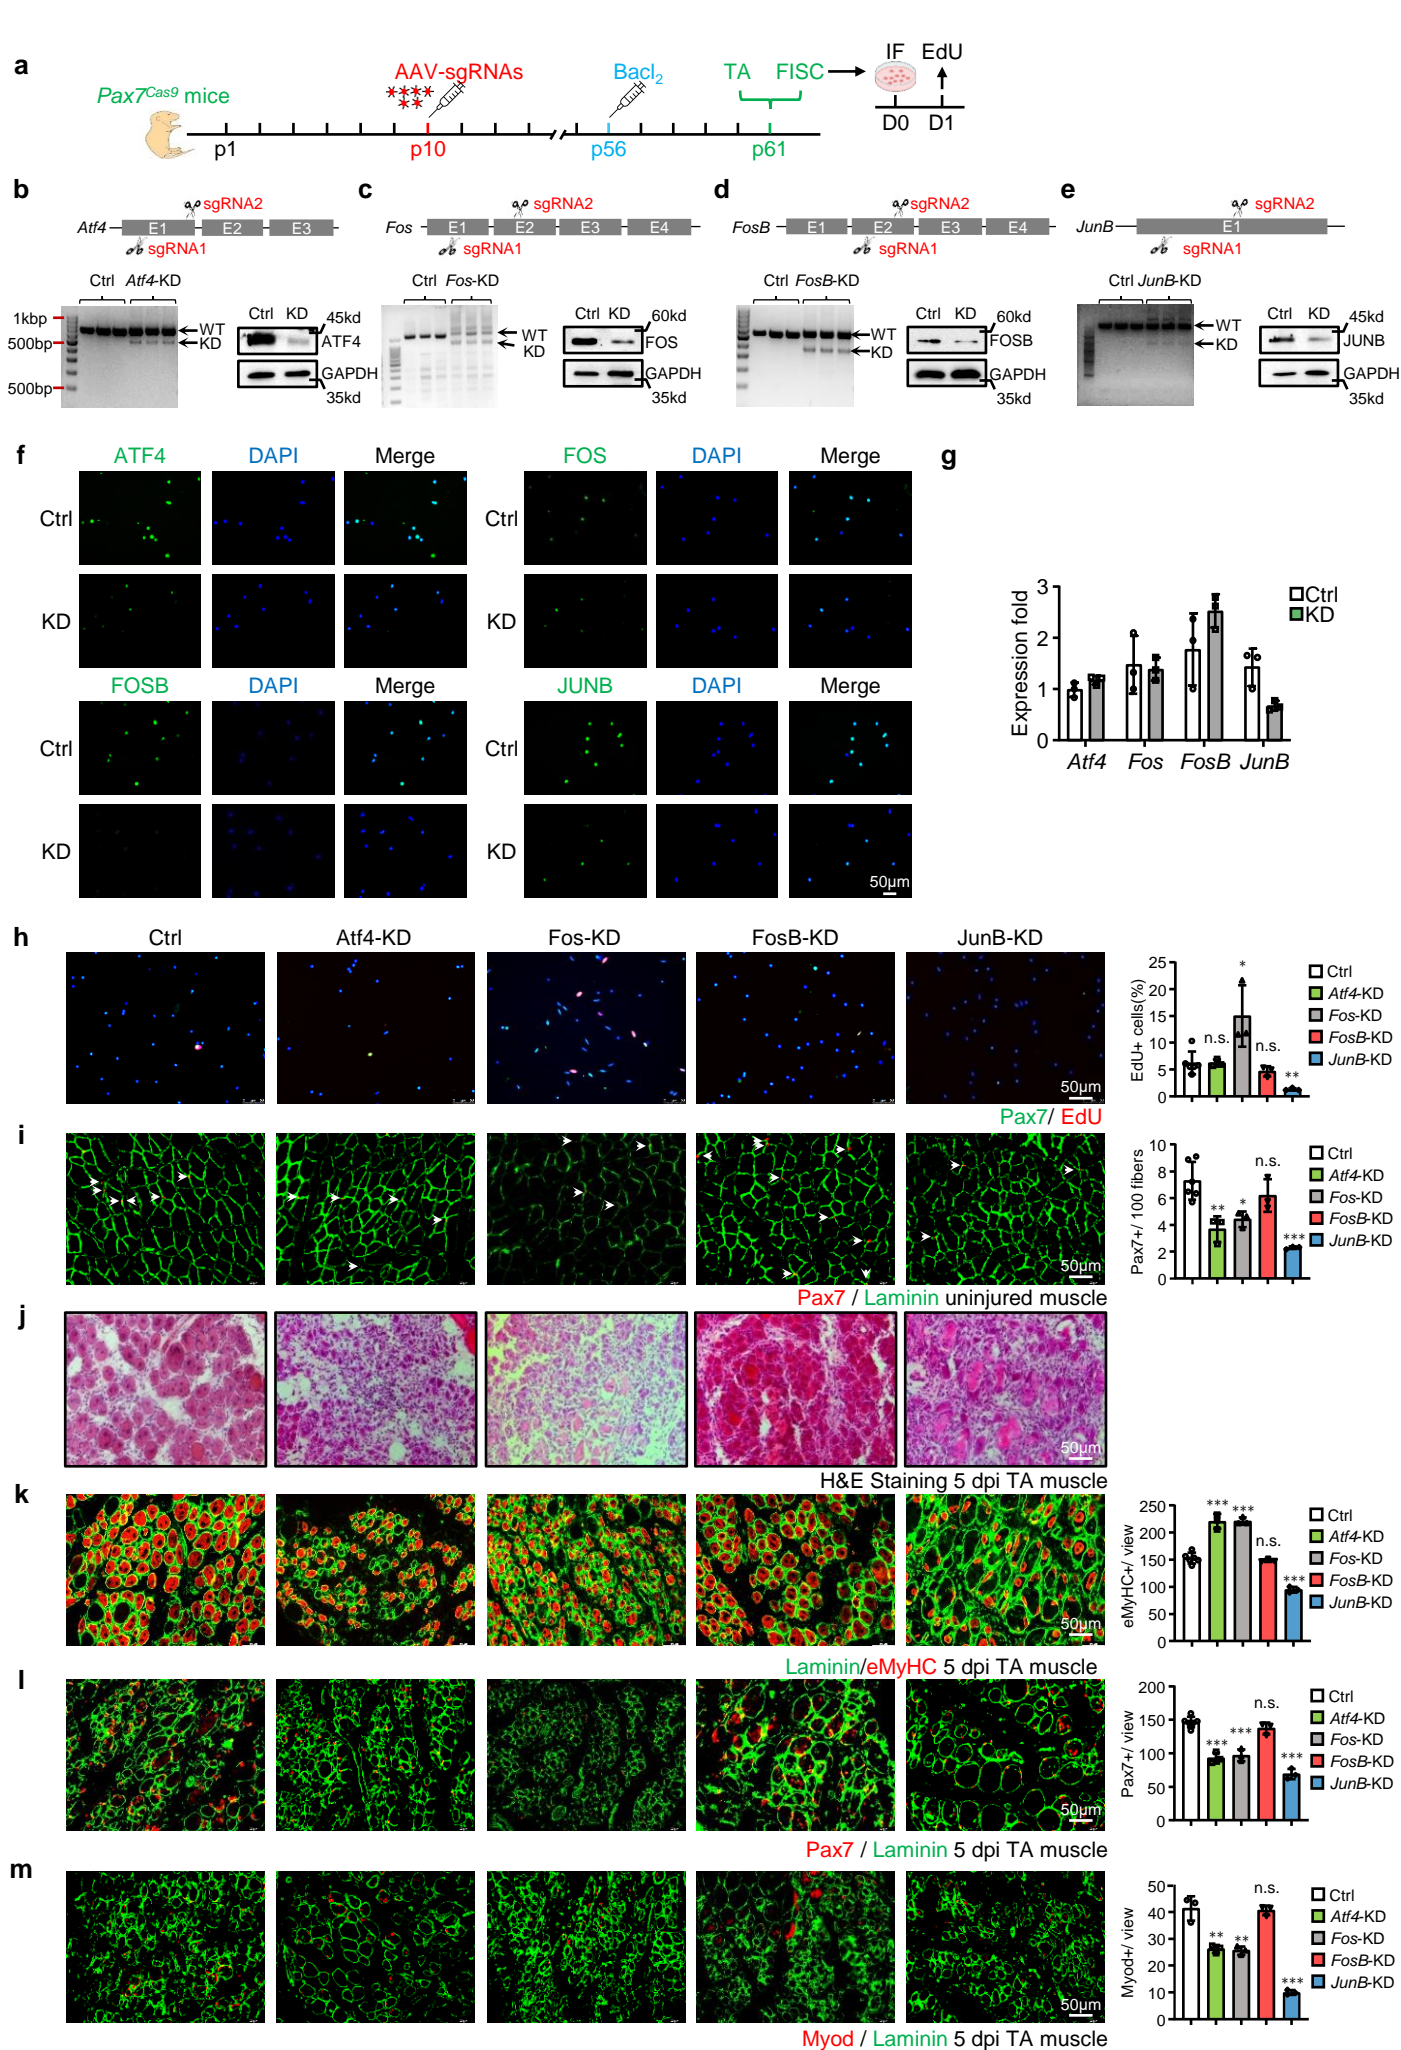

**Supplementary Figure 8. Screening of other functional AP-1 family members in SCs and regeneration.** **a** Schematic outline of the experimental design for screening of functional AP-1 members. **b-e** Upper: Illustration of locations of sgRNAs designed for targeting locus. Lower left: Editing efficiency. WT(Wild-type fragments) and KD(Cas9 cleaved fragments) are indicated by arrows. Lower right: protein levels of the above targeted AP-1 were examined by Western blotting in FISCs. GAPDH was used as a loading control. **f** Protein levels of the above targets were examined by IF staining. **g** The RNA levels of *Atf4*, *Fos*, *FosB* and *JunB* in the above FISCs were examined by RT-qPCR. **h** EdU (red) and Pax7 (green) staining of SCs sorted from *Ctrl* or *Atf4*, *FosB*, *Fos* and *JunB*-KD mice and cultured for 24h. Scale bar: 50µm.  $P = 0.99, 0.010, 0.27$  and  $0.0061$ . **i** IF staining of Pax7 (red) and Laminin (green) on TA muscles from the above KD mice 56 days after AAV injection. Scale bar: 50µm.  $P = 0.0055, 0.013, 0.29$  and  $0.00057$ . **j** H&E staining of the TA muscles collected from the above KO mice at 5dpi. Scale bar: 50µm. **k** IF staining of eMyHC (red) and Laminin (green) on the TA muscles from the above KD mice collected at 5dpi. Scale bar: 50µm.  $P = 0.000056, 0.000014, 0.49$  and  $0.000036$ . **l** IF staining of Pax7 (red) and Laminin (green) on the TA muscles from the KD mice collected at 5dpi. Scale bar: 50µm.  $P = 0.000033, 0.000067, 0.14$  and  $0.0000026$ . **m** IF staining of MyoD (red) and Laminin (green) on the TA muscles collected from the above KD mice at 5dpi. Scale bar: 50µm.  $P = 0.0056, 0.0050, 0.82$  and  $0.00031$ .  $n = 3$  mice per group (b-e, g). For *Ctrl*,  $n = 6$  mice per group. For *Atf4*, *FosB*, *Fos* and *JunB*-KD,  $n = 3$  mice per group. (h-m). All the bar graphs are presented as mean  $\pm$  SD. Student's t-test (two-tailed unpaired) was used to calculate the statistical significance (h-i, k-m): \* $p < 0.05$ , \*\* $p < 0.01$ , \*\*\* $p < 0.001$ . n.s., no significance. Source data are provided as a Source Data file.
